# Supplementary material for: An Automated and High-Throughput Immunoaffinity Magnetic Bead-Based Sample Clean-Up Platform for the Determination of Aflatoxins in Grains and Oils Using UPLC-FLD
Source: PubMed Central journal article supplement (PMC6832433; doi:10.3390/toxins11100583), 2019-10-10
Supplement: toxins-11-00583-s001.pdf [file toxins-11-00583-s001.pdf]

# Supplementary Materials: An automated and high-throughput immunoaffinity magnetic bead-based sample clean-up platform for the determination of aflatoxins in grains and oils using UPLC-FLD

Zhihong Xuan, Jin Ye\*, Bing Zhang, Li Li, Yu Wu, Songxue Wang\*

**Table S1.** Cost breakdown for IMB.

| Componet                         | Price (\$) | Total Amount | Amount /test | # of tests | Cost/ test (\$) |
|----------------------------------|------------|--------------|--------------|------------|-----------------|
| Carboxyl magnetic beads          | 1691.2     | 1000 mg      | 1 mg         | 1000       | 1.7             |
| monoclonal antibody (mAb) of AFT | 2941.2     | 100 mg       | 75 µg        | 1333       | 2.2             |
| Deepwell strip                   | 326.5      | 1000 pairs   | 1 pair       | 1000       | 0.3             |
| Others (Solution and reagent)    | -          | -            | -            | -          | 0.8             |
| Total                            | -          | -            | -            | -          | 5.0             |

**Table S2.** The linearity range, LOD, and LOQ for AFTs.

| Mycotoxin        | Linearity (µg/kg) | LOD (µg/kg) | LOQ (µg/kg) |
|------------------|-------------------|-------------|-------------|
| AFB <sub>1</sub> | 0.5–20            | 0.1         | 0.3         |
| AFB <sub>2</sub> | 0.125–5           | 0.03        | 0.1         |
| AFG <sub>1</sub> | 0.5–20            | 0.1         | 0.3         |
| AFG <sub>2</sub> | 0.125–5           | 0.03        | 0.1         |

**Table S3.** The concentration level AFB<sub>1</sub> (µg/of kg) determined in rice, peanut oil and Maize using IMB and IAC method.

| Sample | Matrix     | IMB  | IAC  | Sample | Matrix     | IMB  | IAC  |
|--------|------------|------|------|--------|------------|------|------|
| #1     | Rice       | 10.5 | 10.2 | #10    | Peanut oil | 16.5 | 16.4 |
| #2     | Rice       | 11.0 | 10.5 | #11    | Peanut oil | 15.0 | 15.2 |
| #3     | Rice       | 10.0 | 9.8  | #12    | Peanut oil | 15.3 | 15.8 |
| #4     | Rice       | 10.4 | 10.0 | #13    | Maize      | 31.0 | 31.7 |
| #5     | Rice       | 9.0  | 8.9  | #14    | Maize      | 33.0 | 32.4 |
| #6     | Rice       | 8.9  | 9.1  | #15    | Maize      | 31.0 | 31.5 |
| #7     | Peanut oil | 15.5 | 15.1 | #16    | Maize      | 30.8 | 30.0 |
| #8     | Peanut oil | 16.0 | 15.5 | #17    | Maize      | 30.6 | 31.0 |
| #9     | Peanut oil | 15.7 | 15.9 | #18    | Maize      | 29.0 | 28.9 |

**Table S4.** The sequence of events in the automated clean-up program.

| Step           | Well | Mixture time/min | Collection time/min |
|----------------|------|------------------|---------------------|
| IMB transfer   | 2    | 1                | 0.5                 |
| Incubation     | 1    | 5                | 0.5                 |
| Wash 1         | 3    | 1                | 0.5                 |
| Wash 2         | 4    | 1                | 0.5                 |
| Elution        | 5    | 1                | 0.5                 |
| IMB collection | 2    | 1                | 0.5                 |

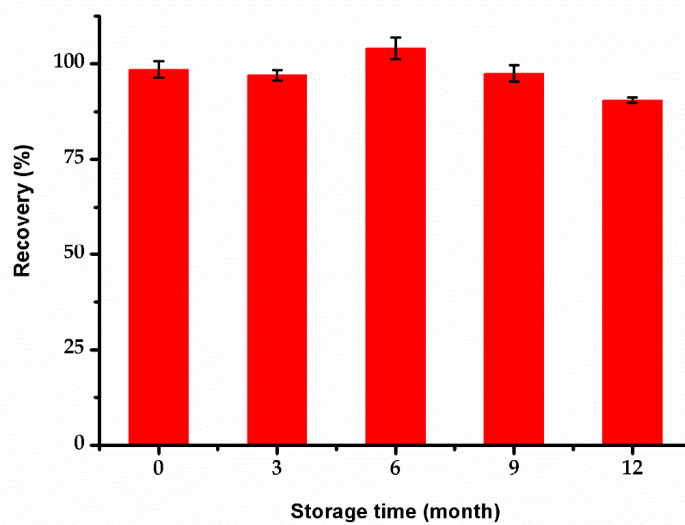

**Figure S1.** Recovery of AFB<sub>1</sub> in terms of storage time.

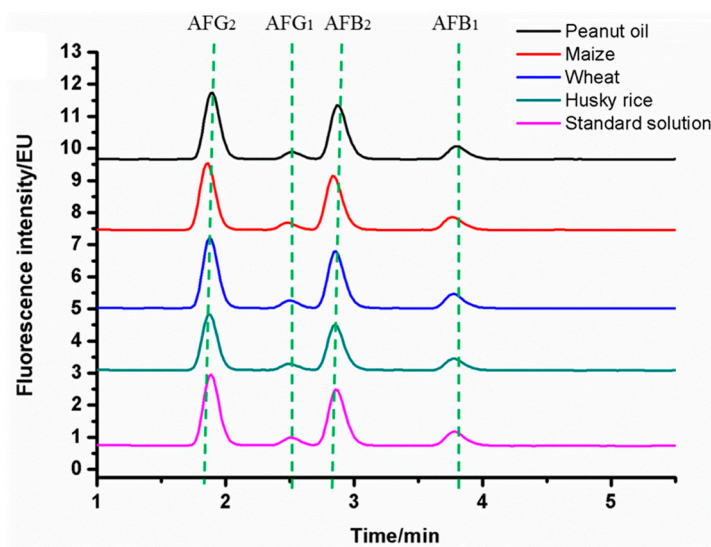

**Figure S2.** The UPLC chromatographic peaks comparison between the standard solution (AFT, 20 µg/kg) and the four kinds of grains and oil (maize, wheat, husky rice, peanut oil, 20 µg/kg, respectively) matrix pretreatment through the automated clean-up method.

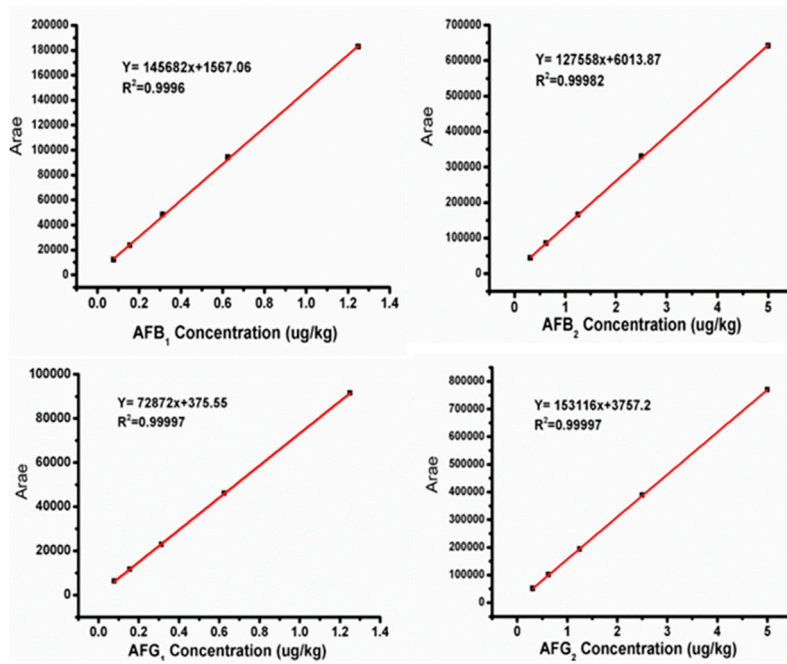

Figure S3. Calibration curves and correlation coefficients for AFT.

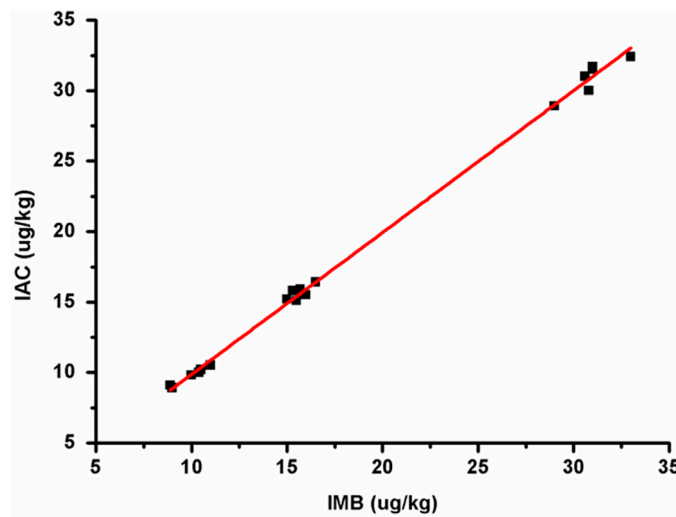

Figure S4. Comparison of IMB and IAC methods for the determination of AFB<sub>1</sub> in real-world samples.
